# Supplementary material for: A Dense Linkage Map for Chinook salmon (Oncorhynchus tshawytscha) Reveals Variable Chromosomal Divergence After an Ancestral Whole Genome Duplication Event
Source: PubMed Central journal article supplement (PMC3962484; doi:10.1534/g3.113.009316), 2013-12-30
Supplement: supp_g3.113.009316_009316SI.pdf [file supp_g3.113.009316_009316SI.pdf]

**A dense linkage map for Chinook salmon (*Oncorhynchus tshawytscha*) reveals variable chromosomal divergence following an ancestral whole genome duplication event.**

Marine S.O. Brieuc, Charles D. Waters, James E. Seeb, Kerry A. Naish

School of Aquatic and Fishery Sciences, University of Washington, Seattle, WA, 98195-5020

Corresponding Author: Marine S.O. Brieuc; School of Aquatic and Fishery Sciences, University of Washington, UW Box 355020, Seattle, WA, 98195-5020, USA; Phone: (206) 616-3148; [mbrieuc@uw.edu](mailto:mbrieuc@uw.edu)

**DOI: 10.1534/g3.113.009316**

### Files S1-S3

Available for download at <http://www.g3journal.org/lookup/suppl/doi:10.1534/g3.113.009316/-/DC1>

**File S1** Script to verify the genotypes inferred with STACKS

**File S2** Database of RAD loci for Chinook salmon

**S2.1:** Non-duplicated loci in the reference database and sequences. Mapped markers have the chromosome arm added to the name (OtXXXXXX\_OtXX[p, c or q]). Markers mapped in the diploid cross only, but for which the arm was not identified have the chromosome preceded by I (inferred; OtXXXXXX\_I0tsXX)

**S2.2:** Duplicated loci in the reference database and sequences. The letter D was added after the name. Mapped markers also have the chromosome arm(s) annotated

**S2.3:** Loci removed from the temporary reference database during screening and sequences.

**File S3** Linkage maps and mapped loci

**S3.1:** Consensus haploid map

**S3.2-S3.4:** Haploid maps for Family A, B and C

**S3.5:** Diploid map

**S3.6:** Position and alleles of the mapped loci

### **File S4**

Percentage of heterozygous offspring in the gynogenetic diploid crosses along all chromosomes. On the x axis the distances are oriented from the p arm. Three gynogenetic crosses were used (F978, F981 and F984). The centromere is located where the percentage of heterozygous offspring is about zero.

Percentage of heterozygotes

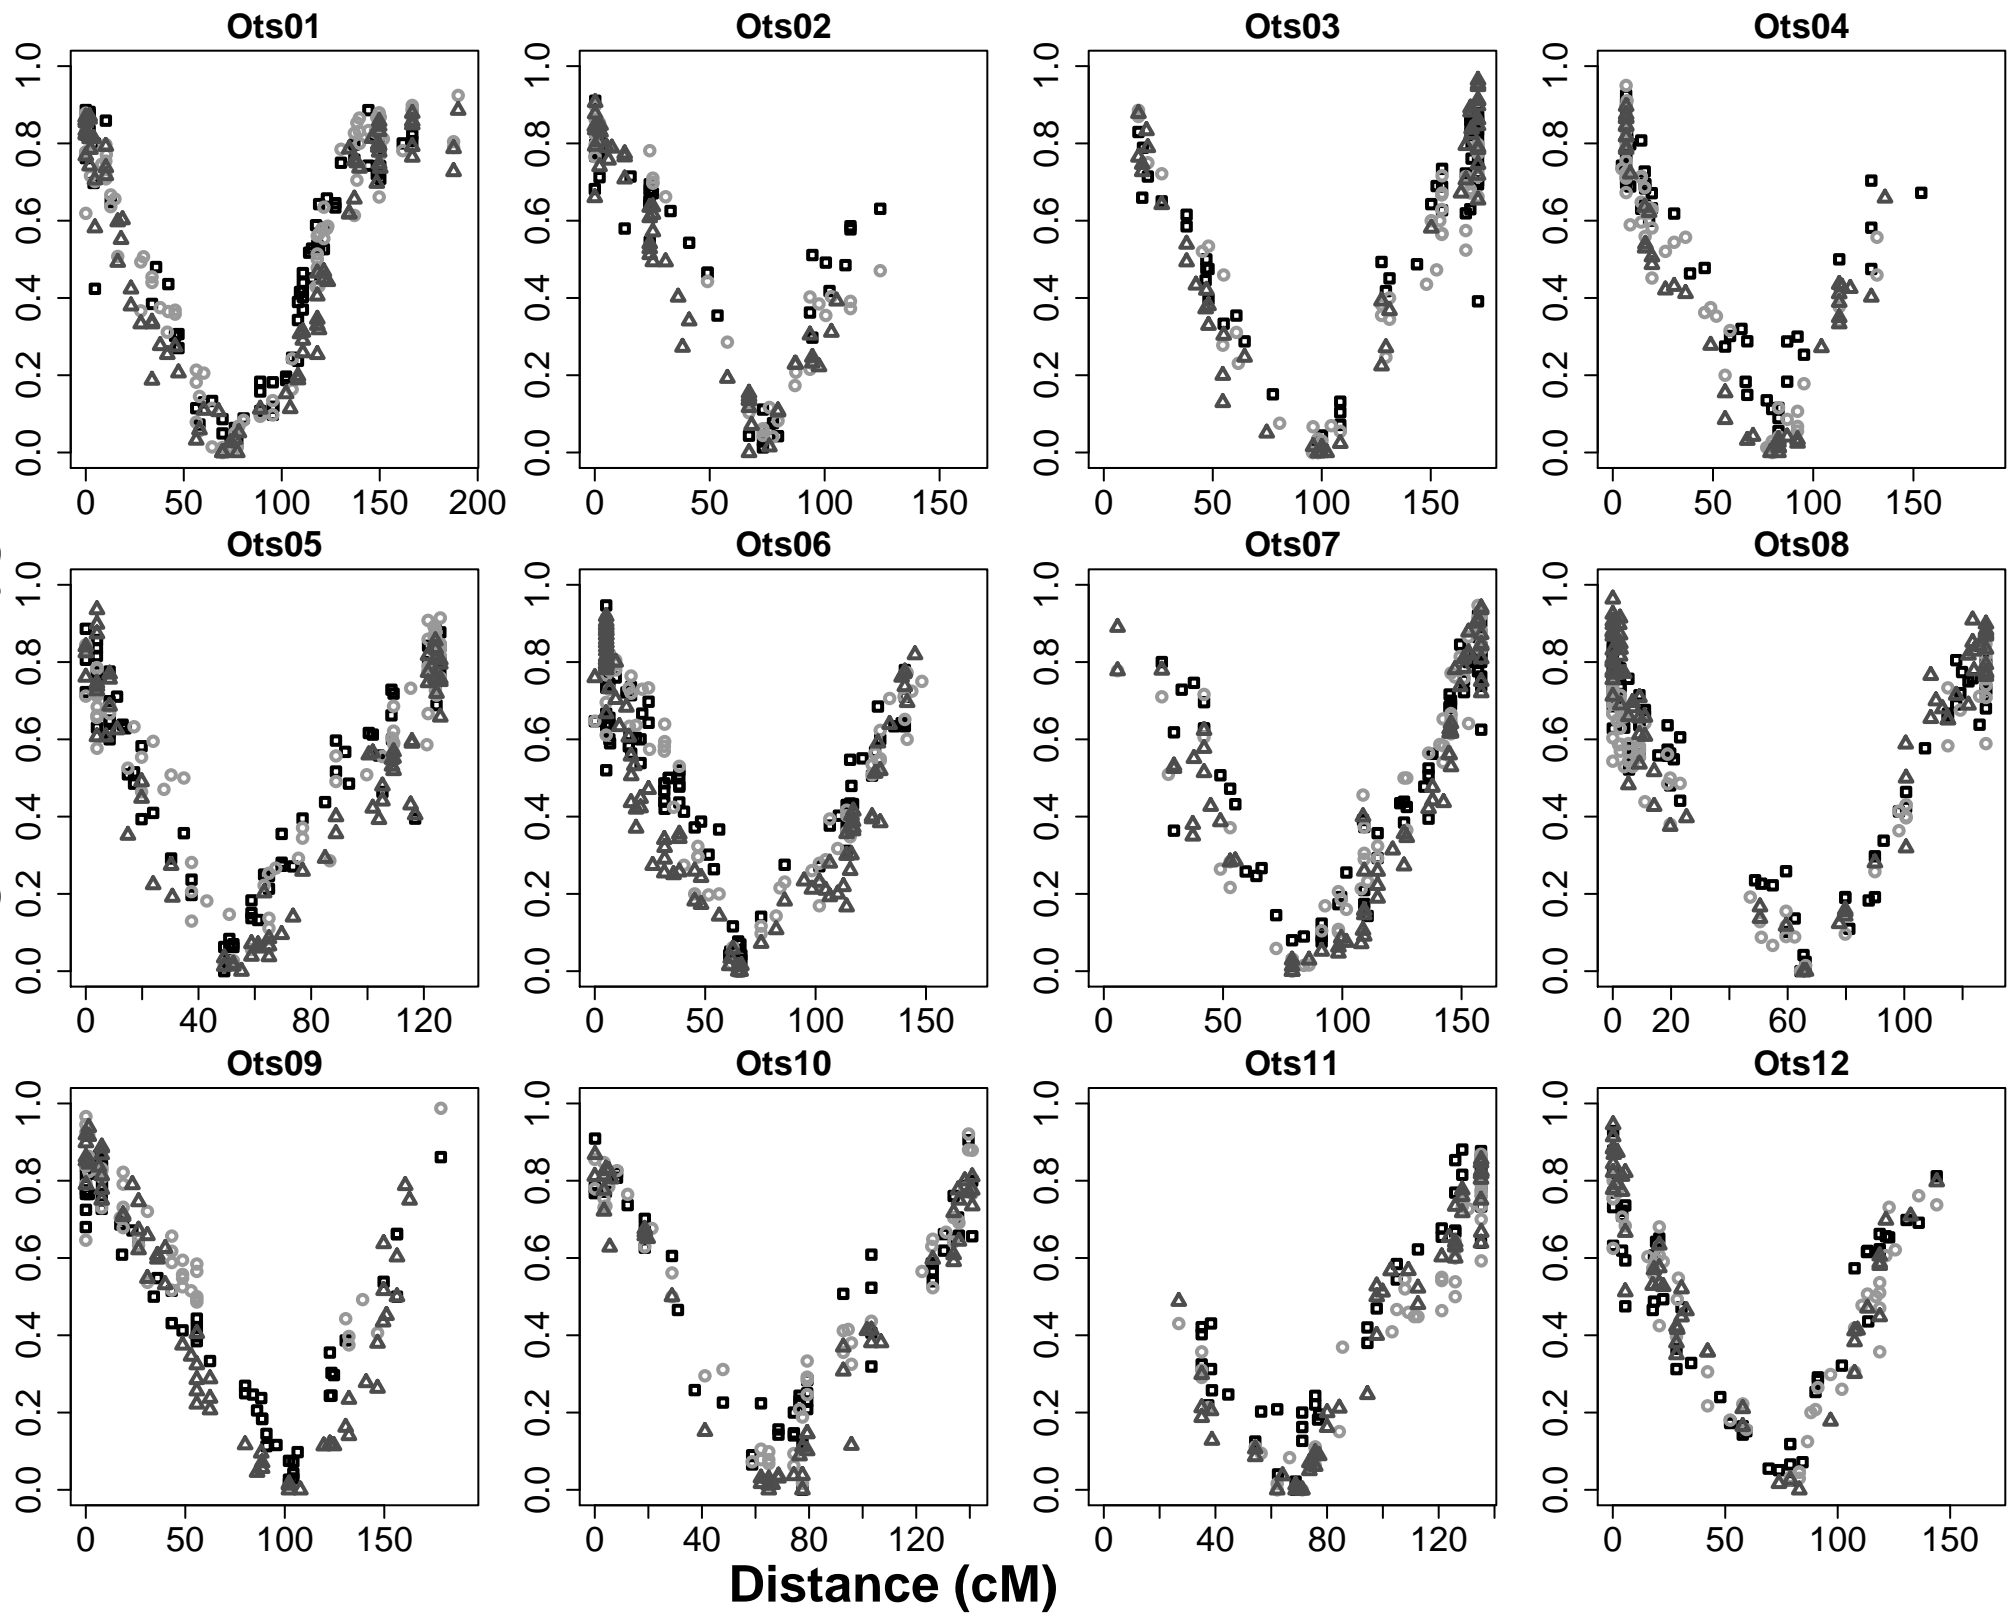

**Percentage of heterozygotes**

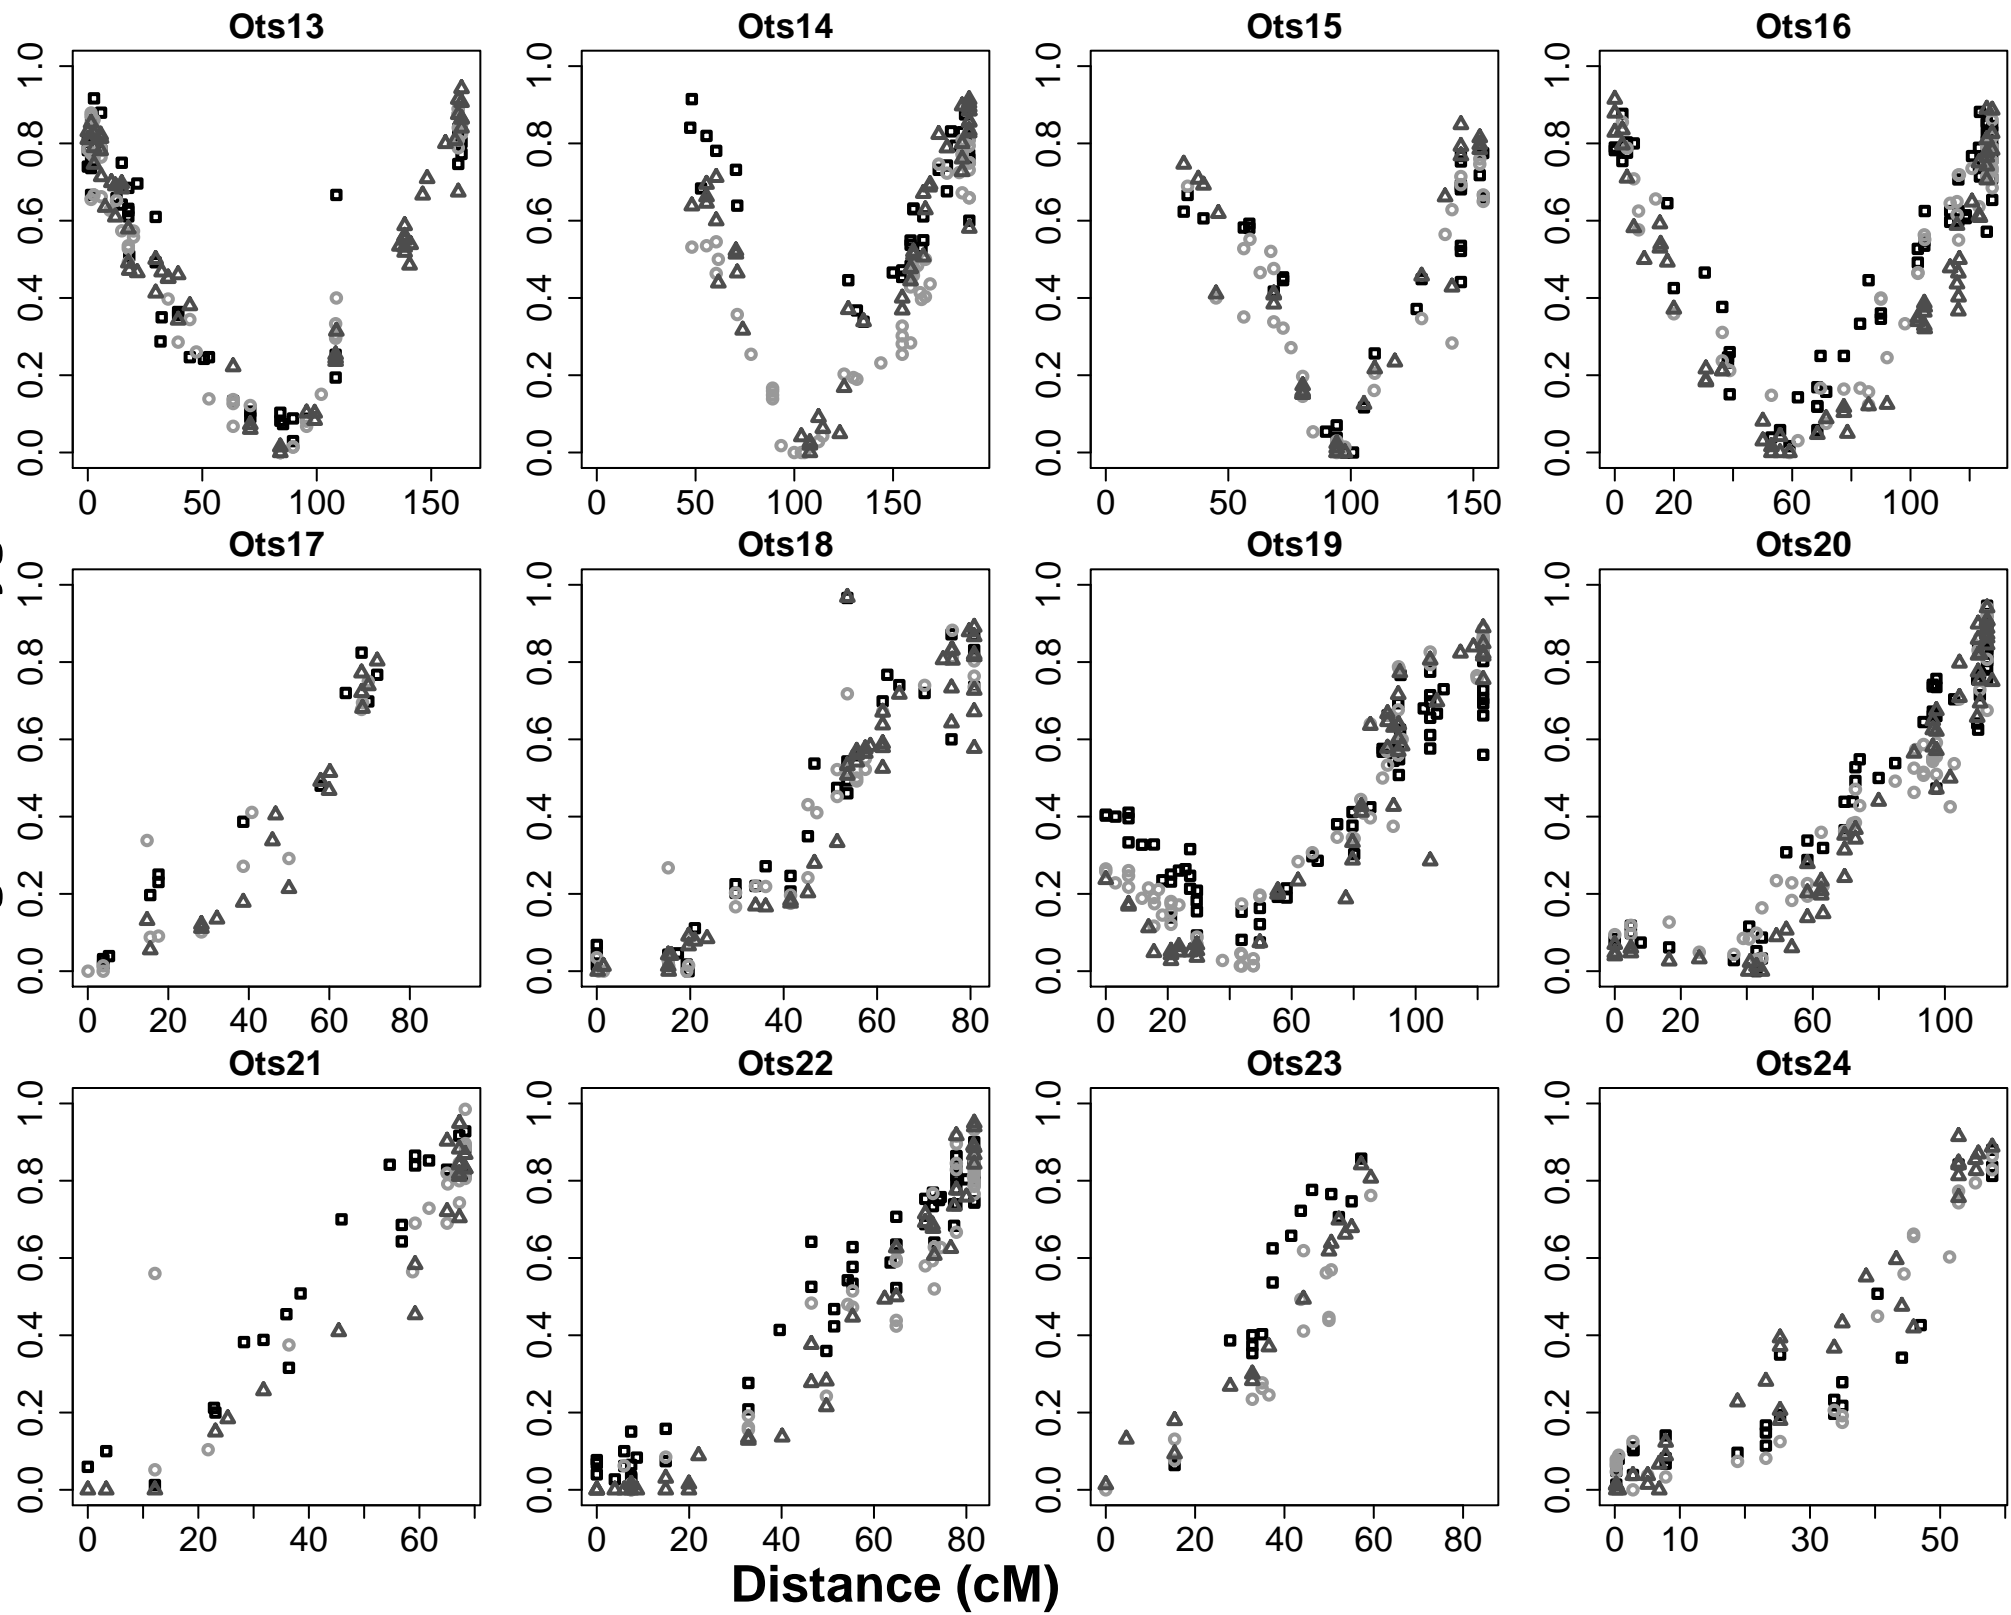

Percentage of heterozygotes

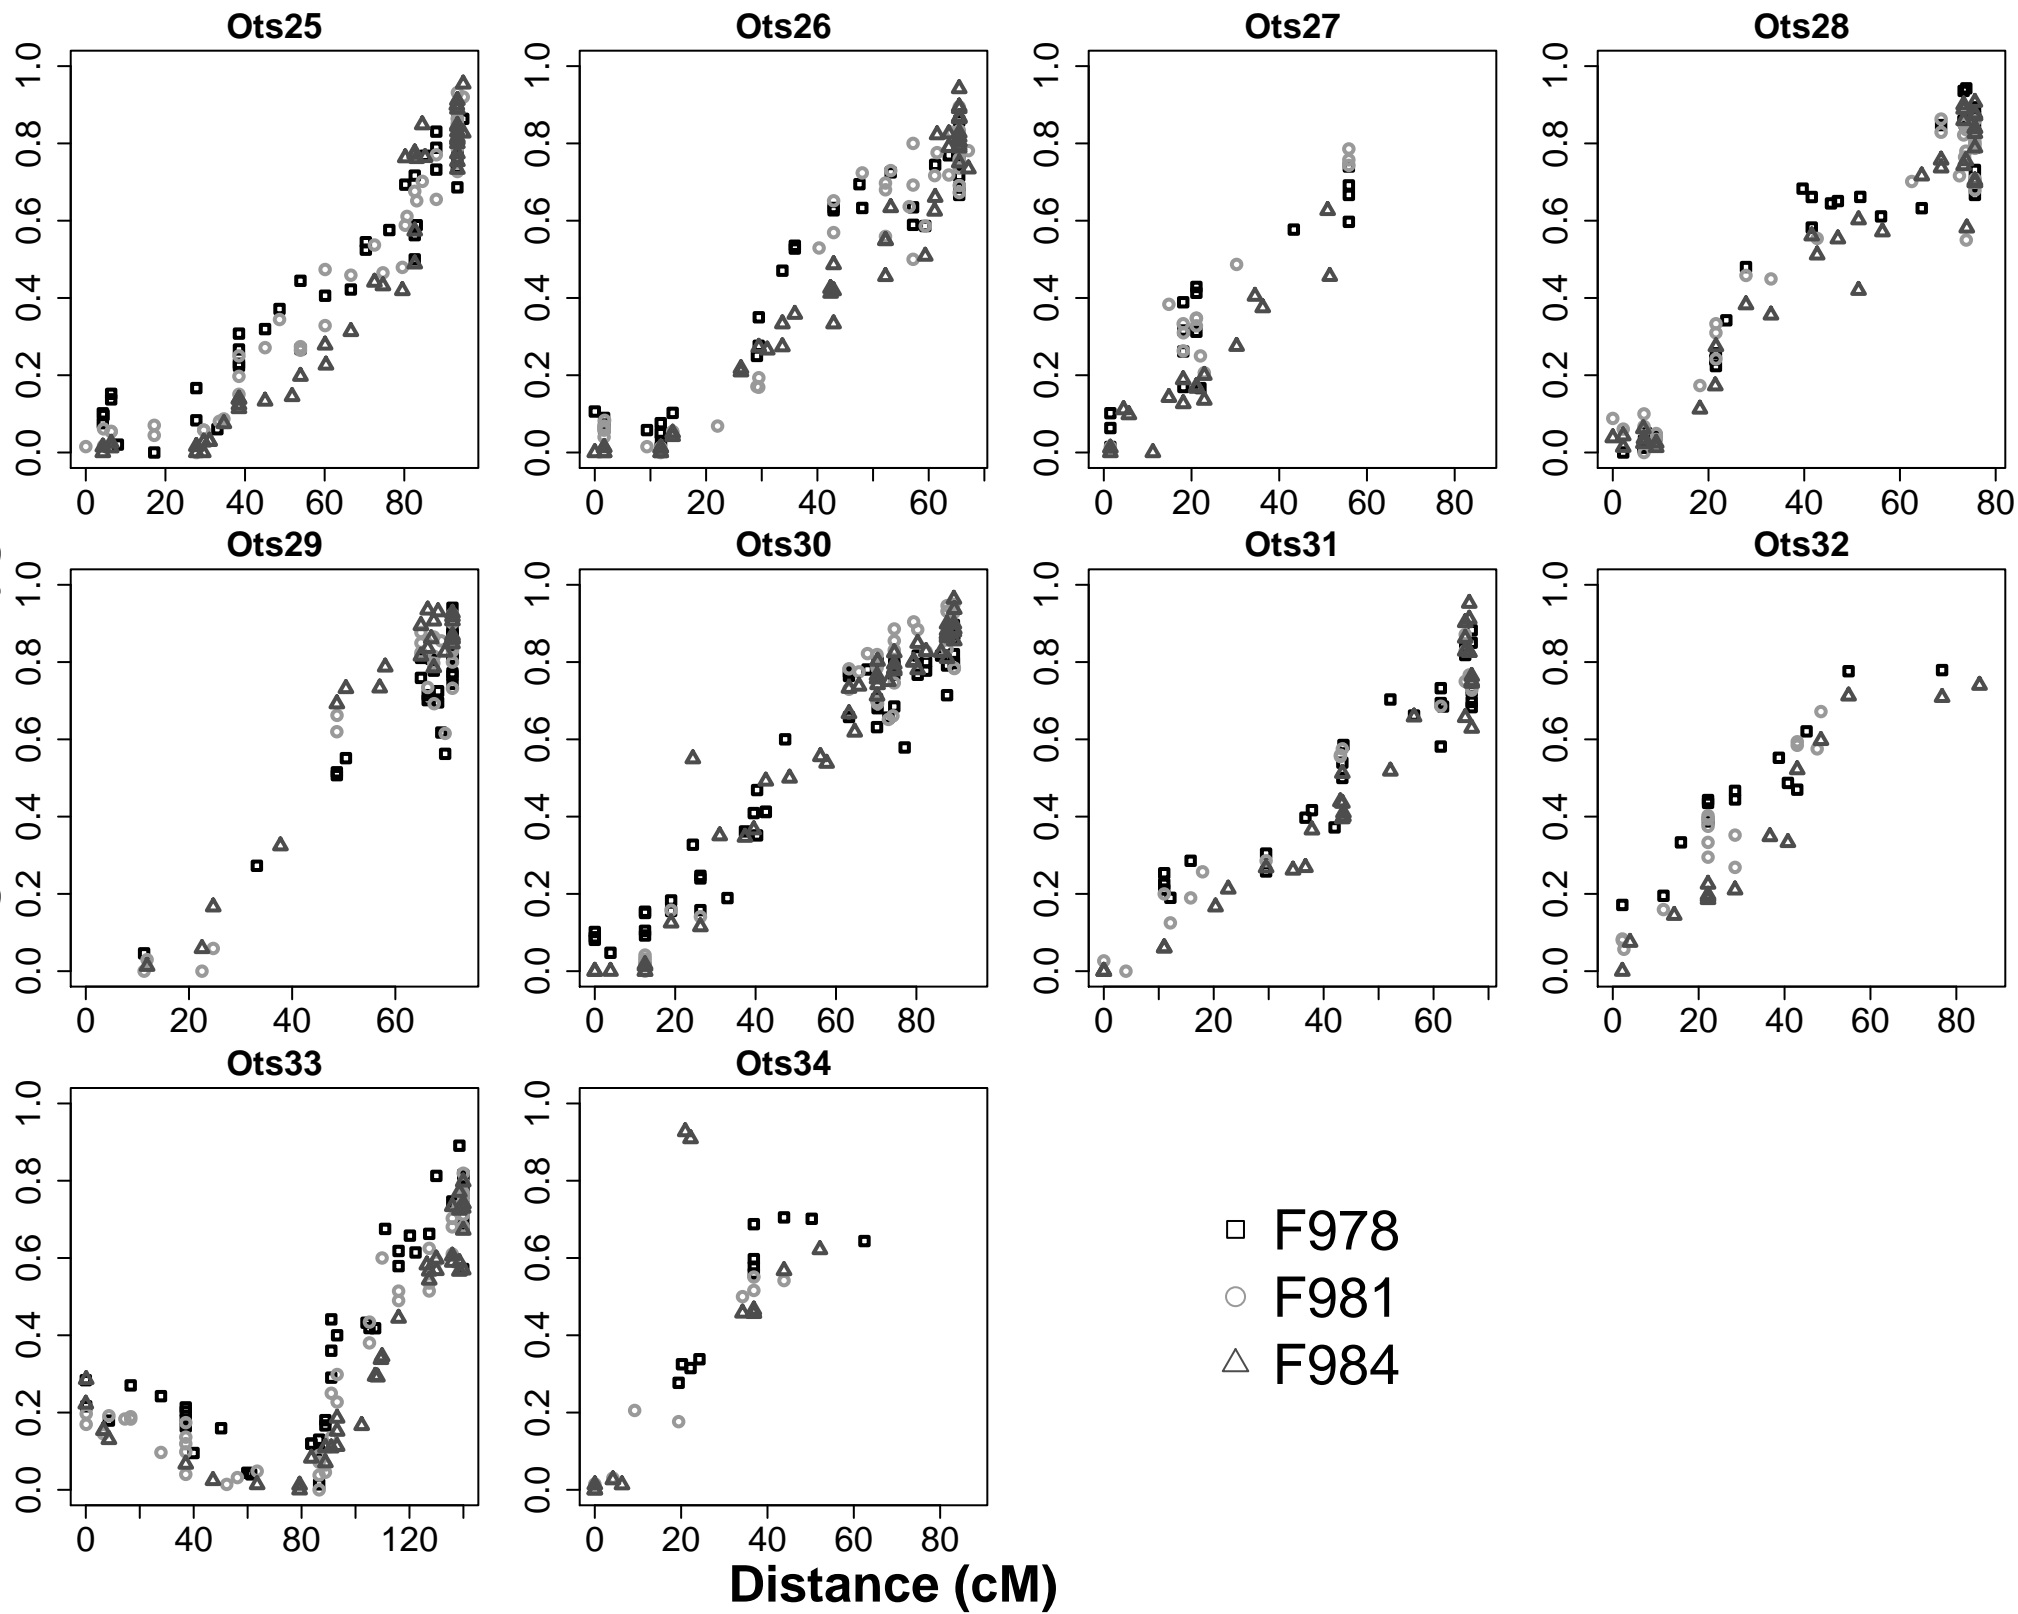

**File S5**

**Available for download as an Excel file at <http://www.g3journal.org/lookup/suppl/doi:10.1534/g3.113.009316/-/DC1>**

Number of individuals from Family A (n = 46) with double crossovers (DCO) for each chromosome arm. \*: A crossover occurred in the centromere of Ots12. It was not possible to attribute the crossover to one arm or the other and so the range of individuals with double crossovers for each arm was estimated.
