# Supplementary material for: A Dense Linkage Map for Chinook salmon (Oncorhynchus tshawytscha) Reveals Variable Chromosomal Divergence After an Ancestral Whole Genome Duplication Event
Source: PubMed Central journal article supplement (PMC3962484; doi:10.1534/g3.113.009316), 2013-12-30

### **File S4**

Percentage of heterozygous offspring in the gynogenetic diploid crosses along all chromosomes. On the x axis the distances are oriented from the p arm. Three gynogenetic crosses were used (F978, F981 and F984). The centromere is located where the percentage of heterozygous offspring is about zero.

Percentage of heterozygotes

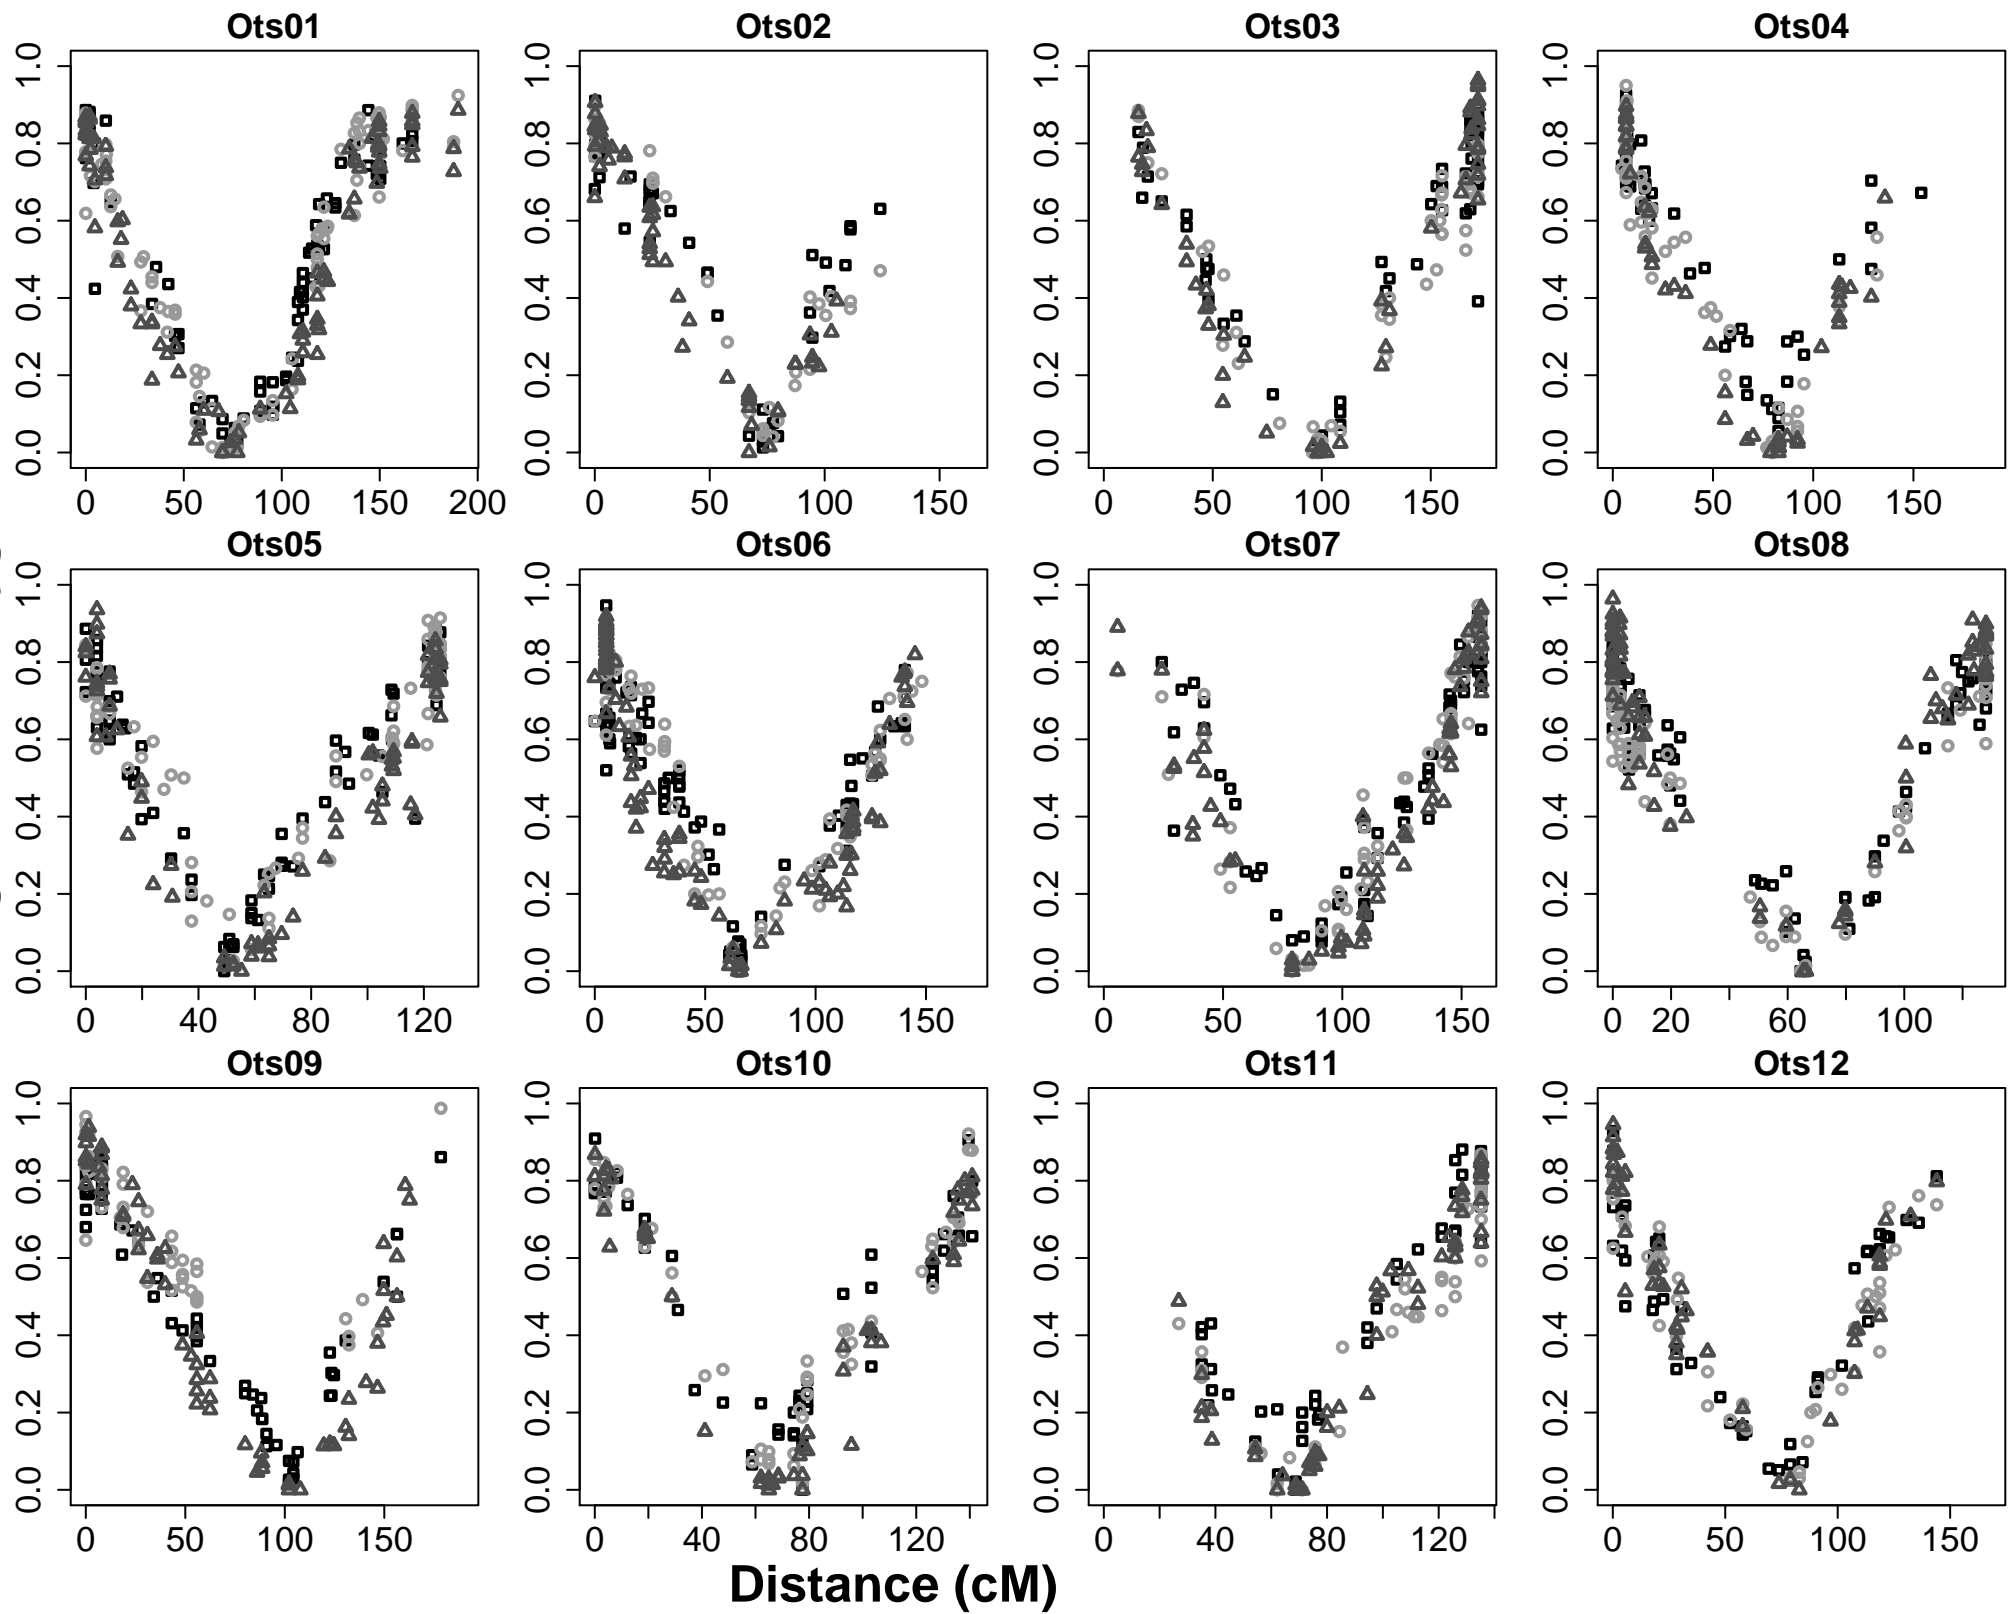

**Percentage of heterozygotes**

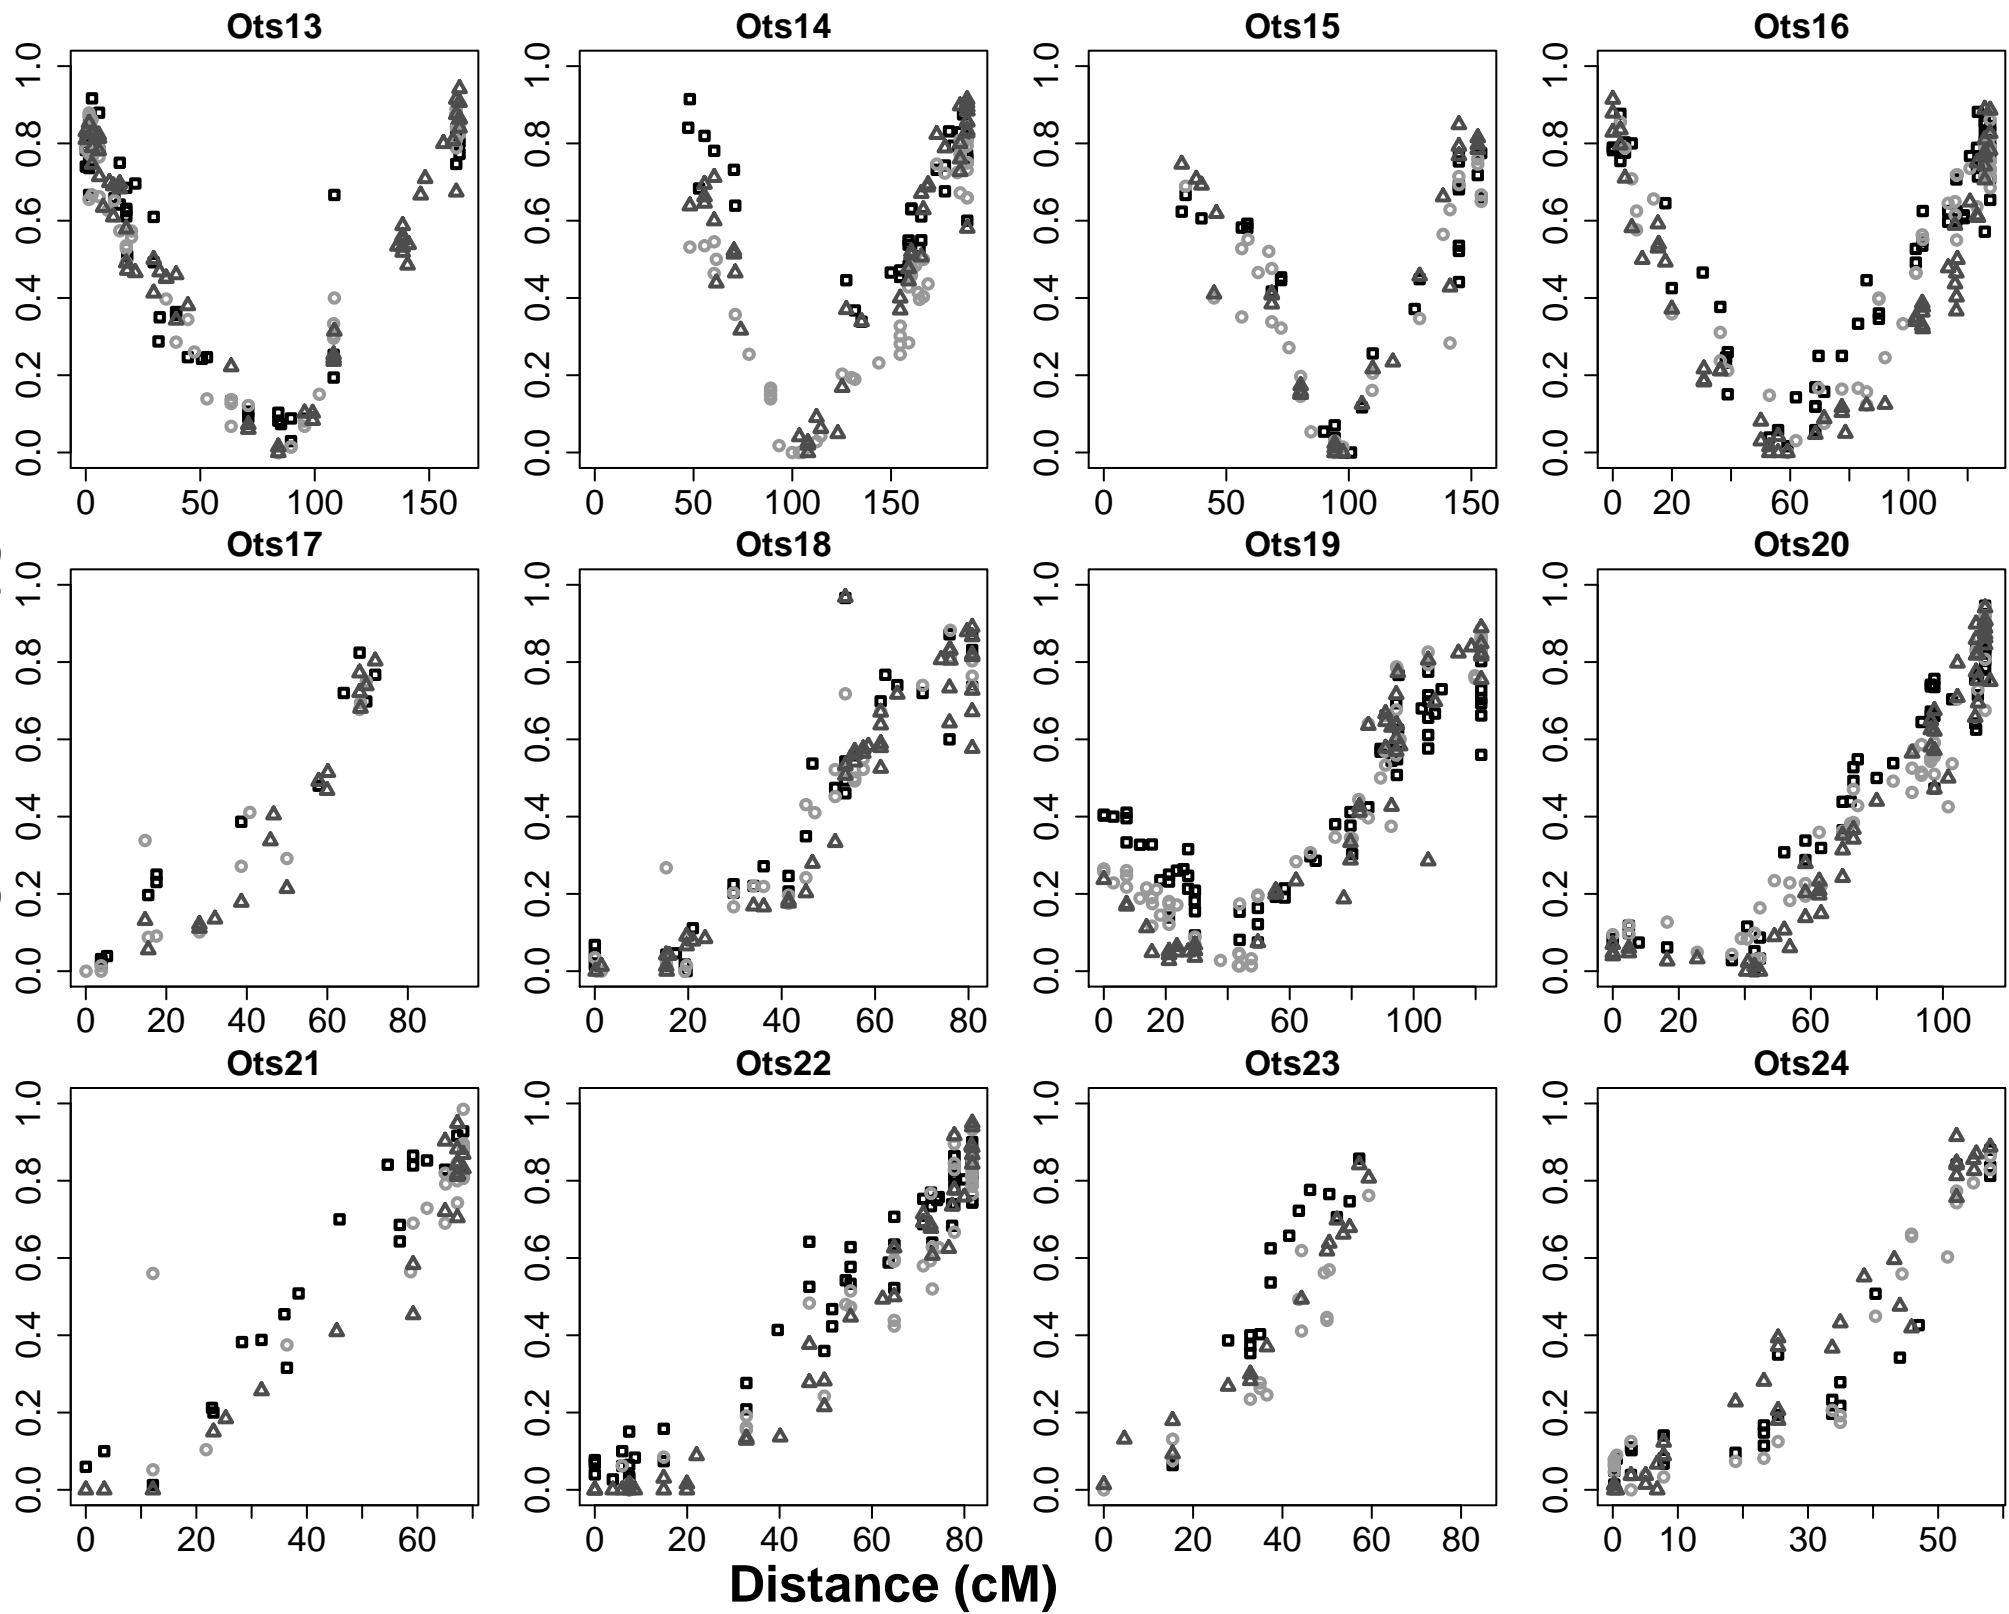

Percentage of heterozygotes

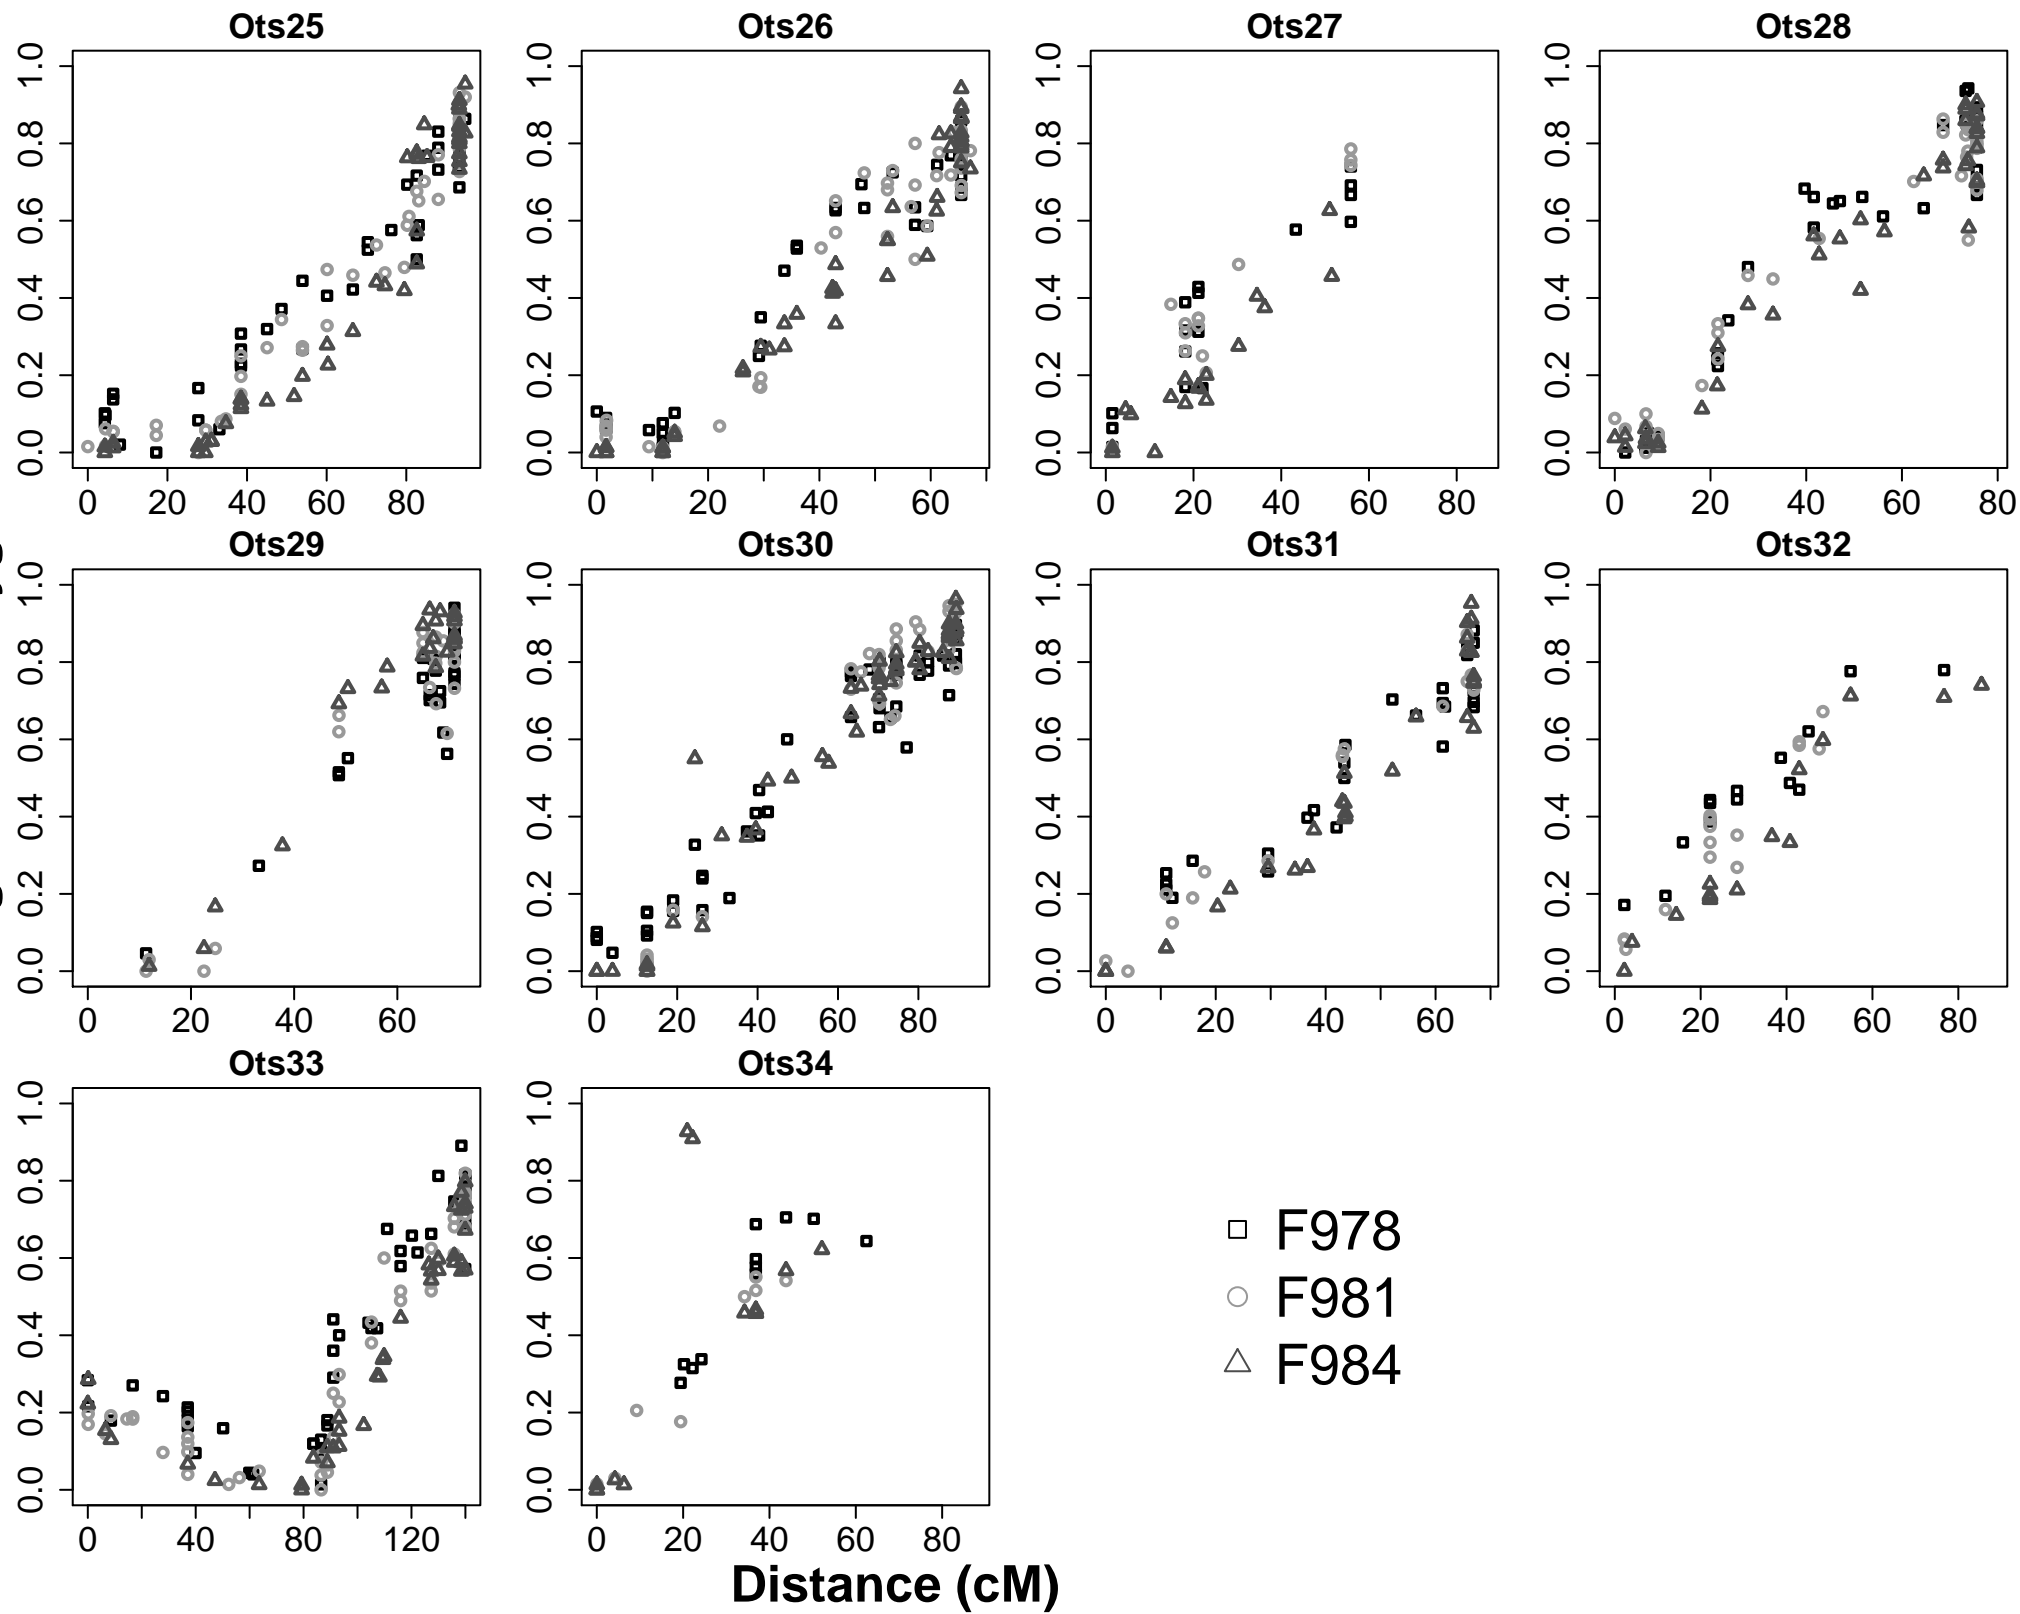

Supplement: supp_g3.113.009316_FileS4.pdf [file supp_g3.113.009316_FileS4.pdf]
